# Supplementary material for: Enhancement of the Green H2 Production by Using TiO2 Composite Polybenzimidazole Membranes
Source: MDPI journal article supplement (doi:10.3390/nano12172920), 2022-08-24
Supplement: s1 [file s1]

Supplementary Materials

# Enhancement of the Green H<sub>2</sub> Production by Using TiO<sub>2</sub> Composite Polybenzimidazole Membranes

Sergio Díaz-Abad, Manuel A. Rodrigo, Cristina Sáez and Justo Lobato \*

Chemical Engineering Department, Enrique Costa Building, University of Castilla-La Mancha, Av. Camilo Jose Cela n 12, 13071 Ciudad Real, Spain; sergio.diazabad@uclm.es (S.D.-A.); manuel.rodrigo@uclm.es (M.A.R.); cristina.saez@uclm.es (C.S.)

\* Correspondence: justo.lobato@uclm.es

**Citation:** Díaz-Abad, S.; Rodrigo, M.A.; Sáez, C.; Lobato, J. Enhancement of the Green H<sub>2</sub> Production by Using TiO<sub>2</sub> Composite Polybenzimidazole Membranes. *Nanomaterials* **2022**, *12*, 2920. <https://doi.org/10.3390/nano12172920>

Academic Editor: Filipe M.L. Figueiredo

Received: 7 July 2022

Accepted: 22 August 2022

Published: 24 August 2022

**Publisher's Note:** MDPI stays neutral with regard to jurisdictional claims in published maps and institutional affiliations.

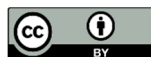

**Copyright:** © 2023 by the authors. Licensee MDPI, Basel, Switzerland. This article is an open access article distributed under the terms and conditions of the Creative Commons Attribution (CC BY) license (<https://creativecommons.org/licenses/by/4.0/>).

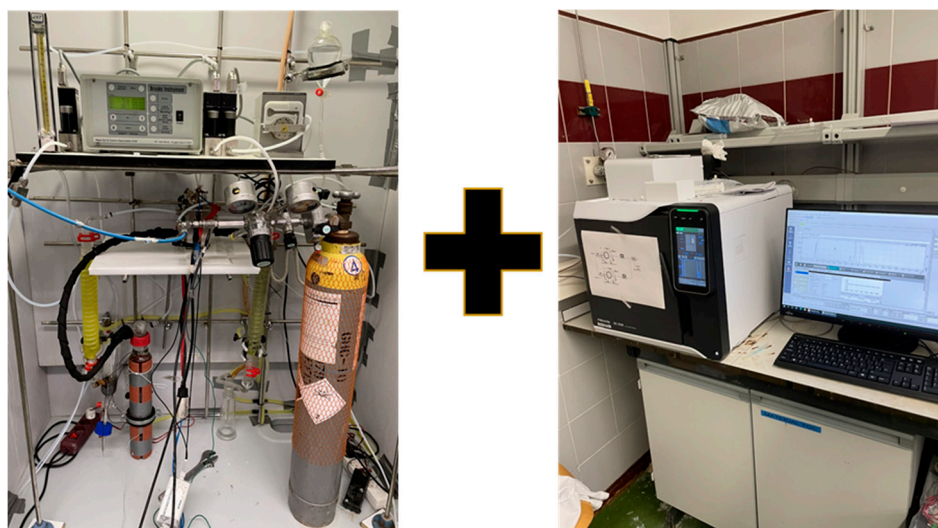

Figure S1. Experimental set-up.

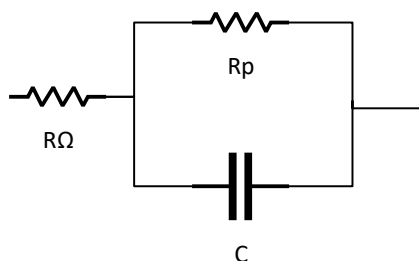

Figure S2. (RC) circuit use to fit the EIS data with the software NOVA.

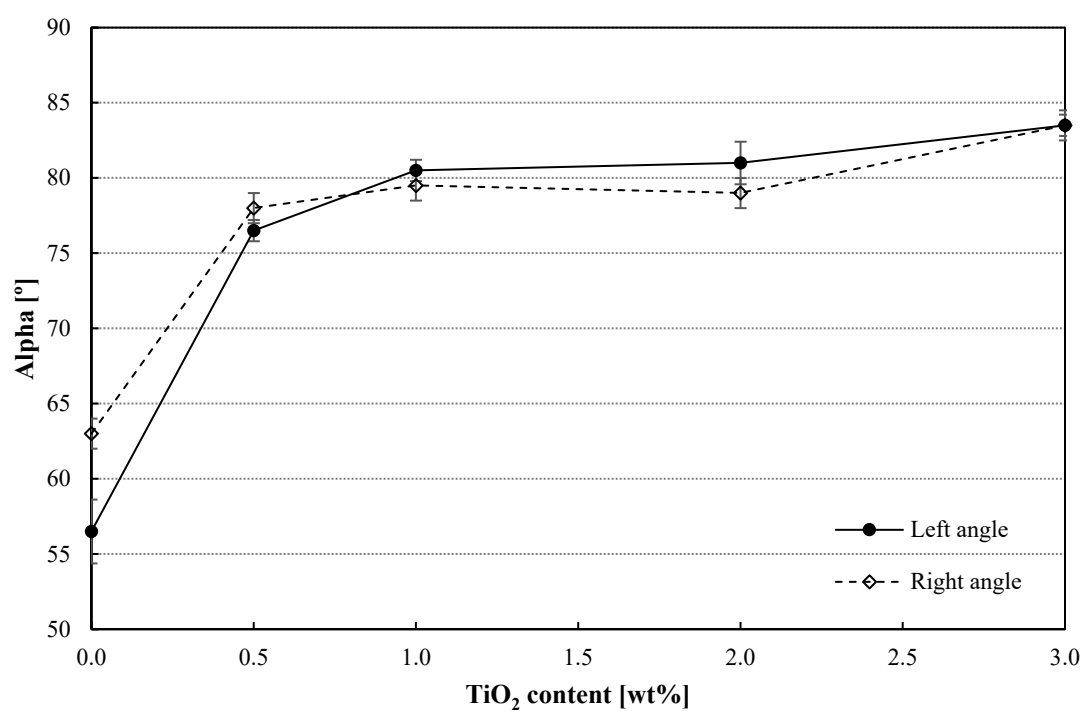

Figure S3. Contact angle for the different TiO<sub>2</sub> concentrations.

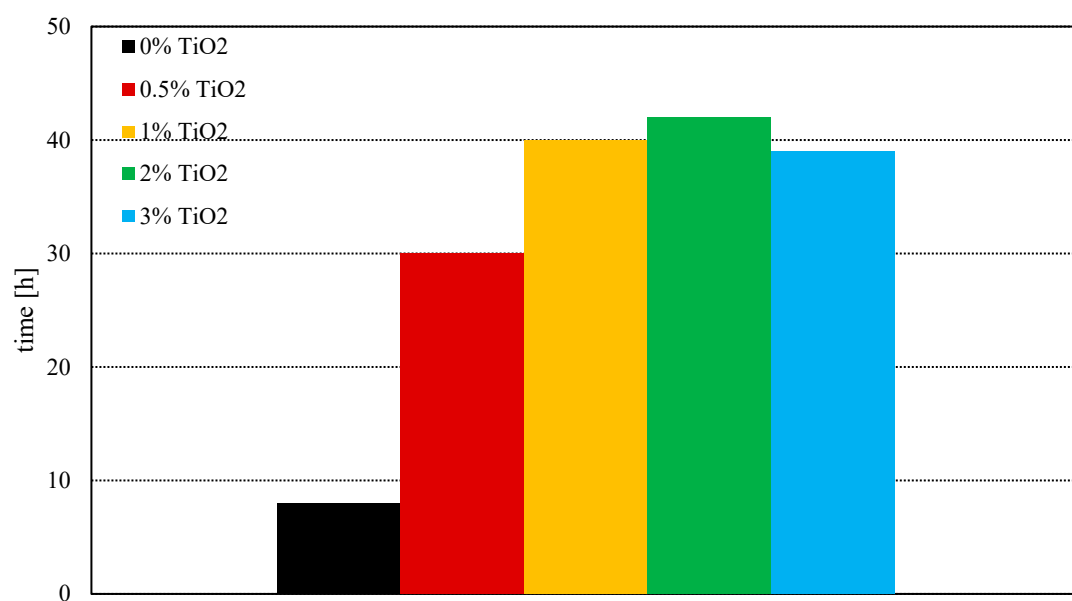

Figure S4. Chemical stability test. Time at which each membrane failed.

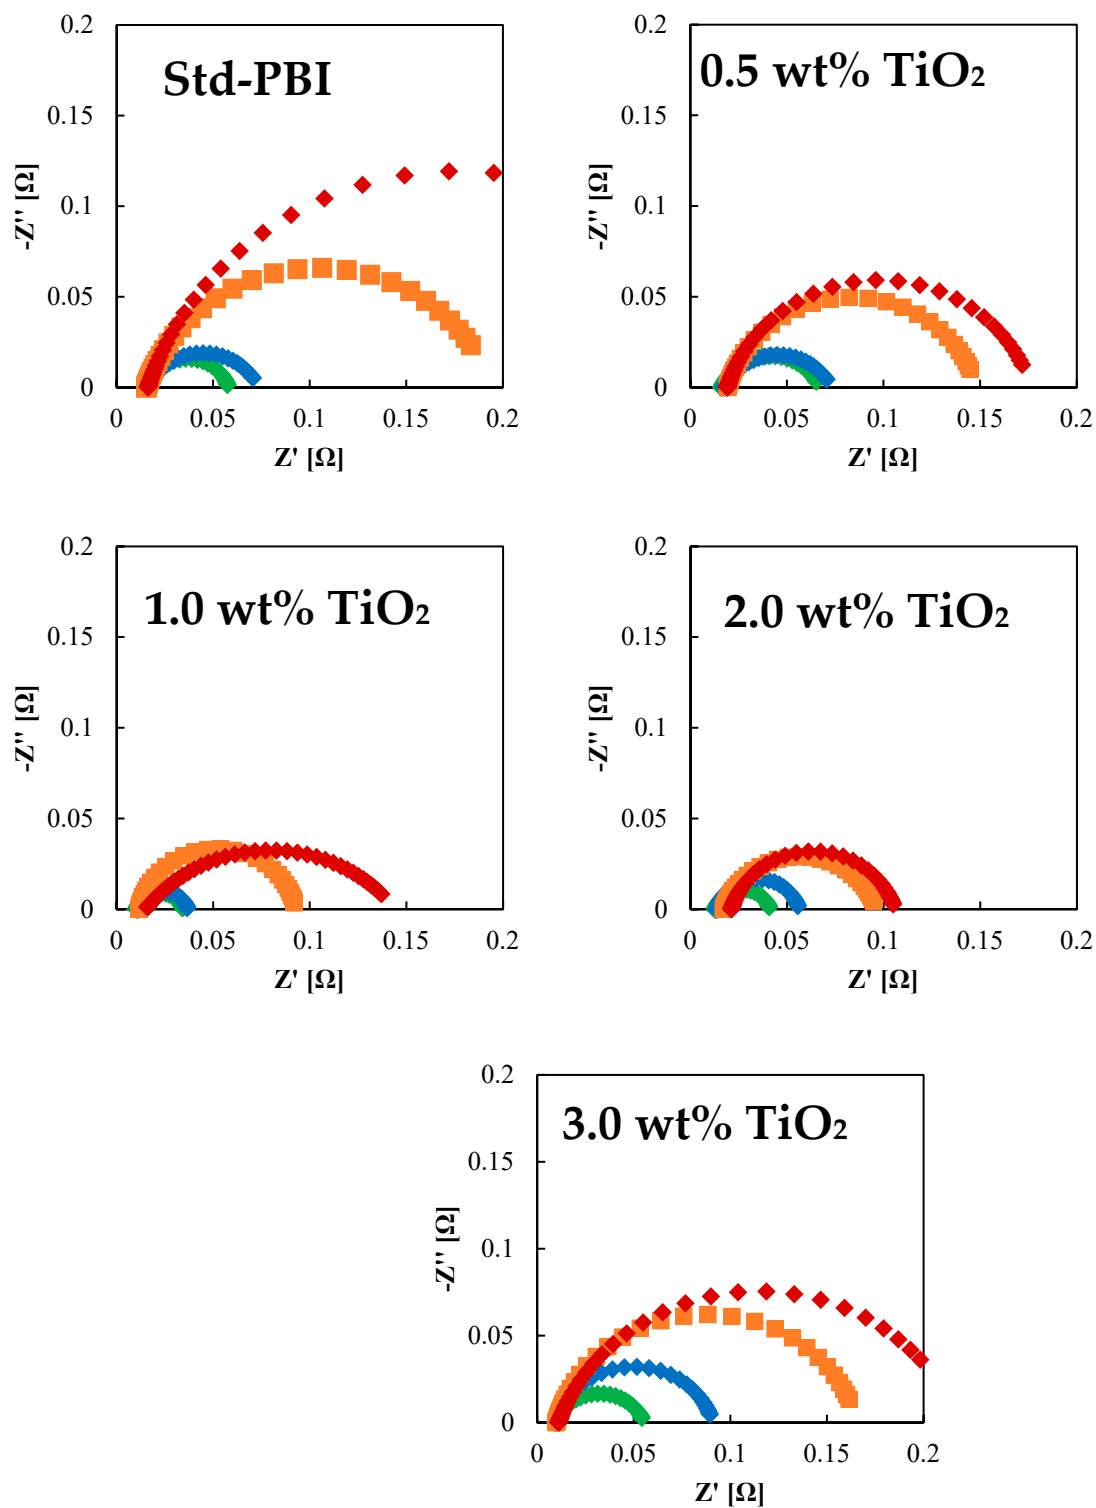

**Figure S5.** Nyquist plots at 0.7 V for the studied membranes. Green dots: 110 °C; Blue dots: 120 °C; Orange dots: 130 °C; Red dots: 140 °C.

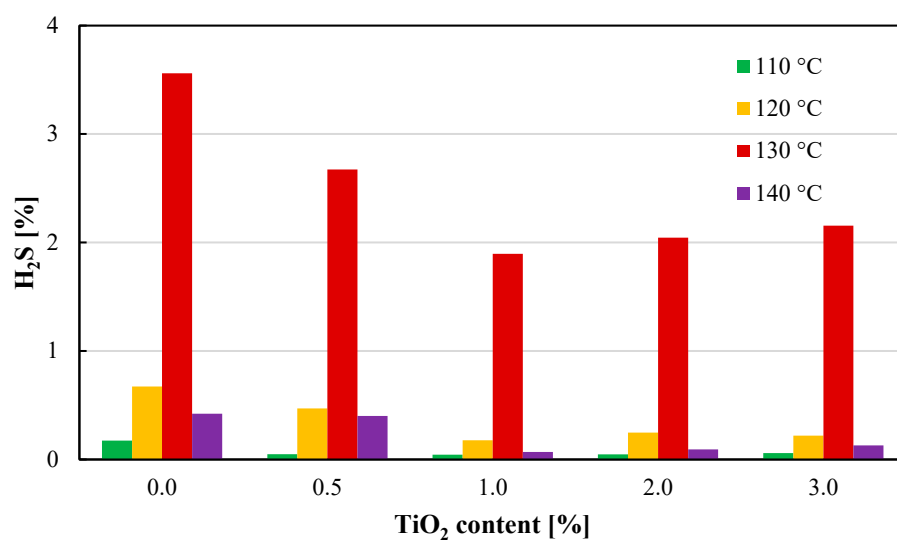

Figure S6. H<sub>2</sub>S contents in the cathode outlet measured at 0.6 V.

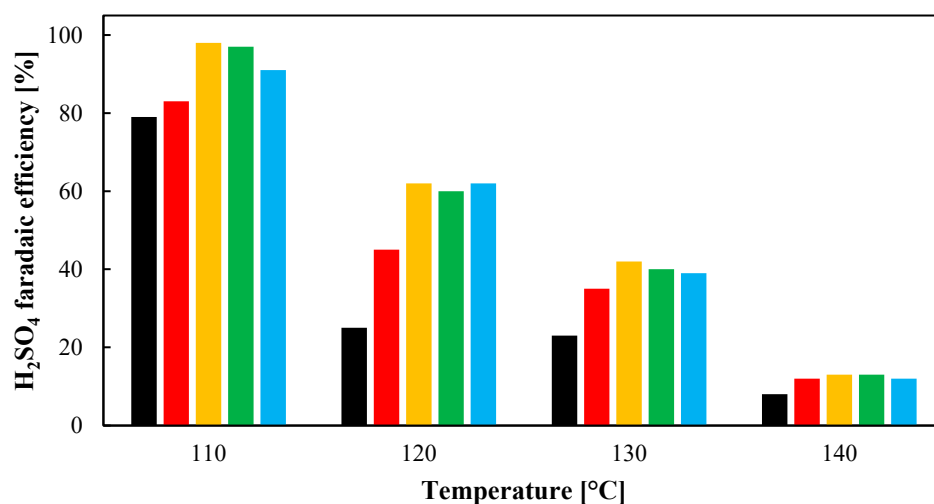

Figure S7. H<sub>2</sub>SO<sub>4</sub> production efficiency in the anode measured at 0.6 V. Black column: Std-PBI; Red column: 0.5 wt% TiO<sub>2</sub>-PBI; Yellow column: 1.0 wt% TiO<sub>2</sub>-PBI; Green column: 2.0 wt% TiO<sub>2</sub>-PBI; Blue column: 3.0 wt% TiO<sub>2</sub>-PBI.

Table S1. SO<sub>2</sub> crossover flux.

| Membrane                      | Crossover flux [mol SO <sub>2</sub> cm <sup>-2</sup> s <sup>-1</sup> · 10 <sup>-5</sup> ] |        |        |        |
|-------------------------------|-------------------------------------------------------------------------------------------|--------|--------|--------|
|                               | 110 °C                                                                                    | 120 °C | 130 °C | 140 °C |
| Std-PBI                       | 3.40                                                                                      | 3.56   | 4.23   | 4.50   |
| 0.5 wt% TiO <sub>2</sub> -PBI | 3.07                                                                                      | 3.15   | 3.73   | 4.21   |
| 1.0 wt% TiO <sub>2</sub> -PBI | 2.32                                                                                      | 2.57   | 3.40   | 3.98   |
| 2.0 wt% TiO <sub>2</sub> -PBI | 1.74                                                                                      | 1.99   | 3.07   | 3.80   |
| 3.0 wt% TiO <sub>2</sub> -PBI | 1.53                                                                                      | 1.70   | 2.90   | 3.66   |
